# Supplementary material
Source: PubMed Central journal article supplement (PMC8063572)
Supplement: NIHMS1689119-supplement-Supp_figure_S1.pdf [file NIHMS1689119-supplement-Supp_figure_S1.pdf]

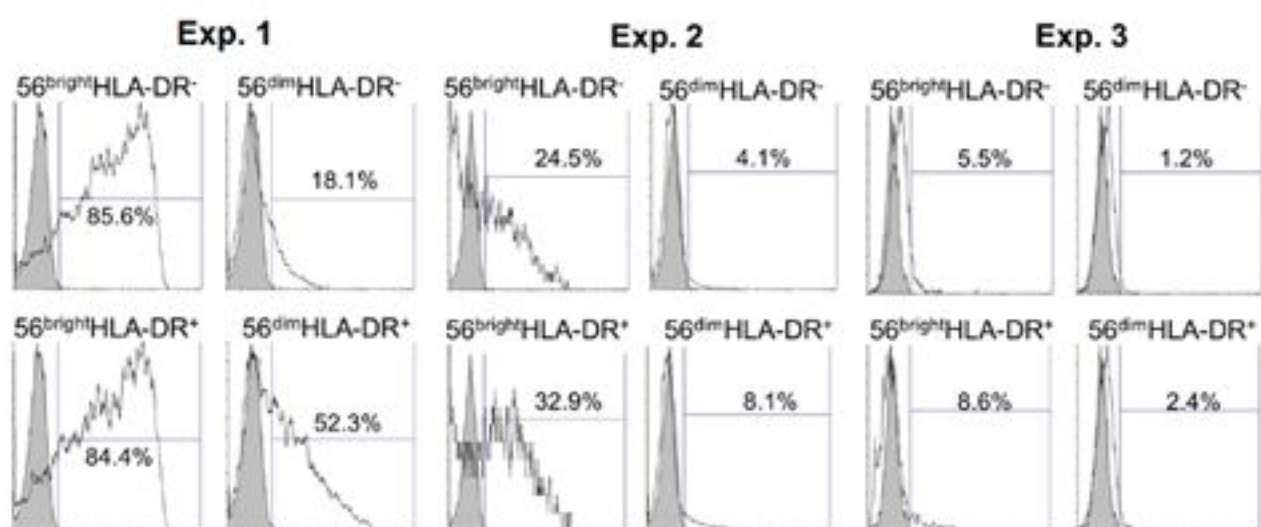

**Supplementary Figure 1.** Cytometry data of IFN $\gamma$  production in freshly isolated enriched CD56<sup>bright</sup>HLA-DR<sup>-</sup>, CD56<sup>bright</sup>HLA-DR<sup>+</sup>, CD56<sup>dim</sup>HLA-DR<sup>-</sup>, CD56<sup>dim</sup>HLA-DR<sup>+</sup> NK cells measured by intracellular staining. Prior to that cells were stimulated with IL-12 and IL-15 for 20 hours. Overlay histograms show fluorescence intensity in isotype control (filled) and in the samples stained for IFN $\gamma$  (empty). Data obtained from three independent experiments are shown.
