# Supplementary material
Source: PubMed Central journal article supplement (PMC8063572)
Supplement: NIHMS1689119-supplement-Supp_figure_S2.pdf [file NIHMS1689119-supplement-Supp_figure_S2.pdf]

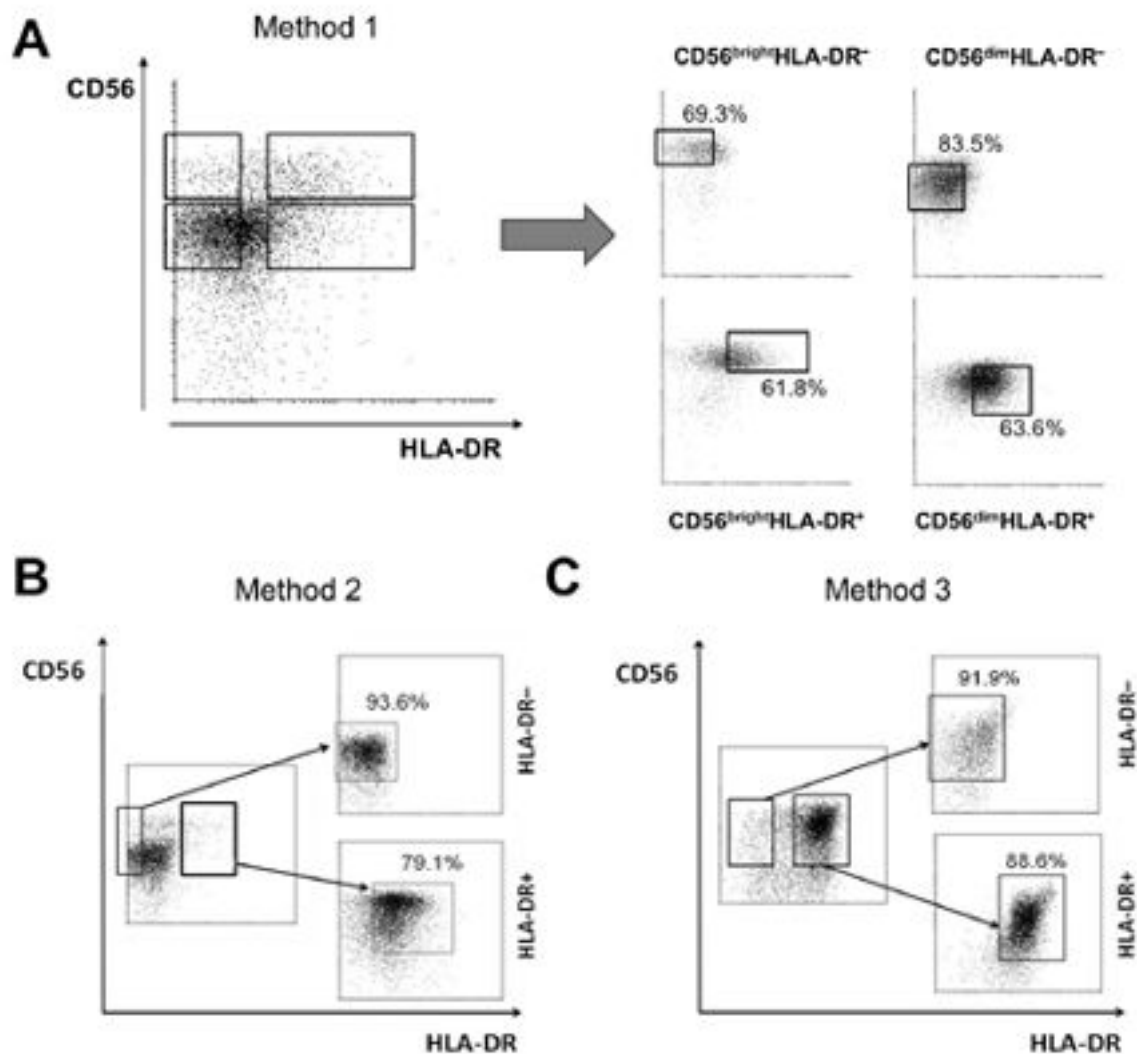

**Supplementary Figure 2.** Strategy and typical results of sorting of freshly isolated NK cells into  $CD56^{\text{bright}}HLA\text{-DR}^-$ ,  $CD56^{\text{bright}}HLA\text{-DR}^+$ ,  $CD56^{\text{dim}}HLA\text{-DR}^-$ ,  $CD56^{\text{dim}}HLA\text{-DR}^+$  subsets (A), freshly isolated NK cells into  $HLA\text{-DR}^+$  and  $HLA\text{-DR}^-$  subsets (B), of NK cells, preliminarily stimulated with IL-2 and K562-mbIL-21 for 6 days, into  $HLA\text{-DR}^+$  and  $HLA\text{-DR}^-$  subsets (C).
