# Supplementary material
Source: PubMed Central journal article supplement (PMC8063572)
Supplement: NIHMS1689119-supplement-Supp_figure_S3.pdf [file NIHMS1689119-supplement-Supp_figure_S3.pdf]

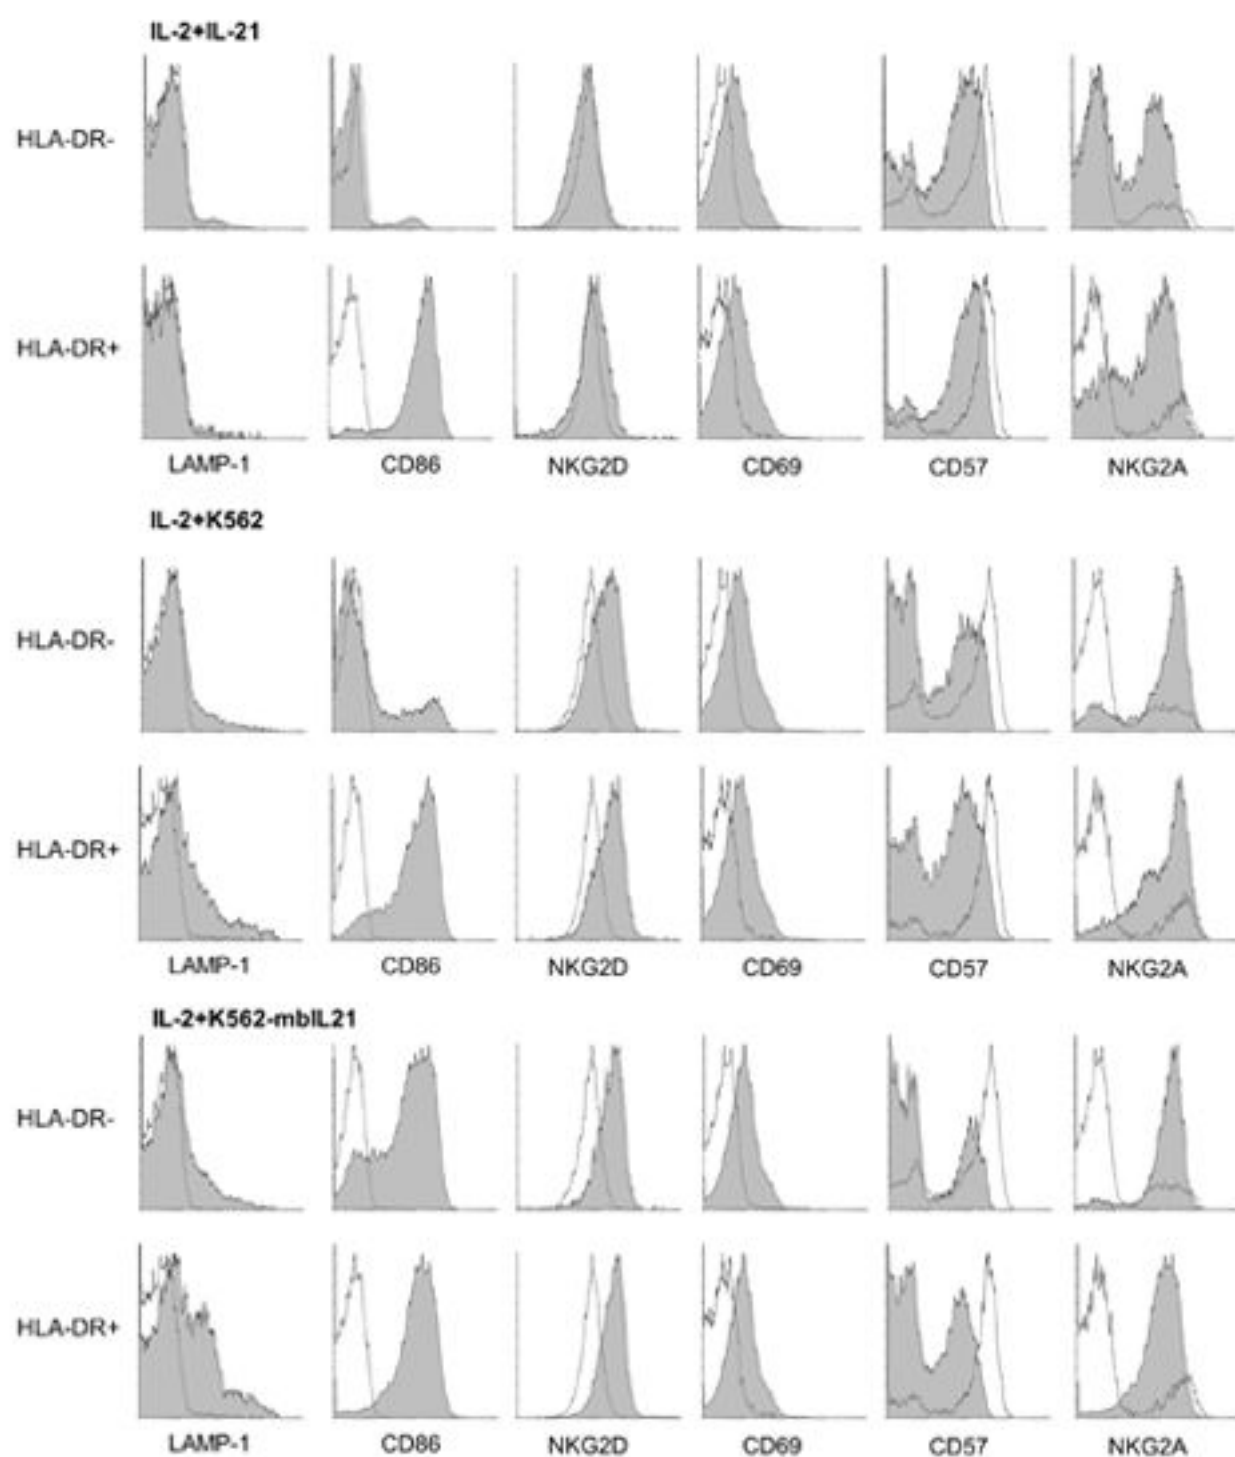

**Supplementary Figure 3.** Cytometry data of surface markers expression in HLA-DR-positive and HLA-DR-negative NK cells. Overlay histograms show expression of the indicated molecule at day 0 (empty) and day 3 or 6 (filled) of stimulation with IL-2+IL-21, IL-2+K562 or IL-2+K562-mbIL21 in HLA-DR<sup>+</sup> and HLA-DR<sup>-</sup> subsets (day 3 for LAMP-1 molecule). Representative data obtained from a single donor out of 3 or 5 donors examined is shown in each diagram.
