# Supplementary material
Source: PubMed Central journal article supplement (PMC8063572)
Supplement: NIHMS1689119-supplement-Supp_figure_S4.pdf [file NIHMS1689119-supplement-Supp_figure_S4.pdf]

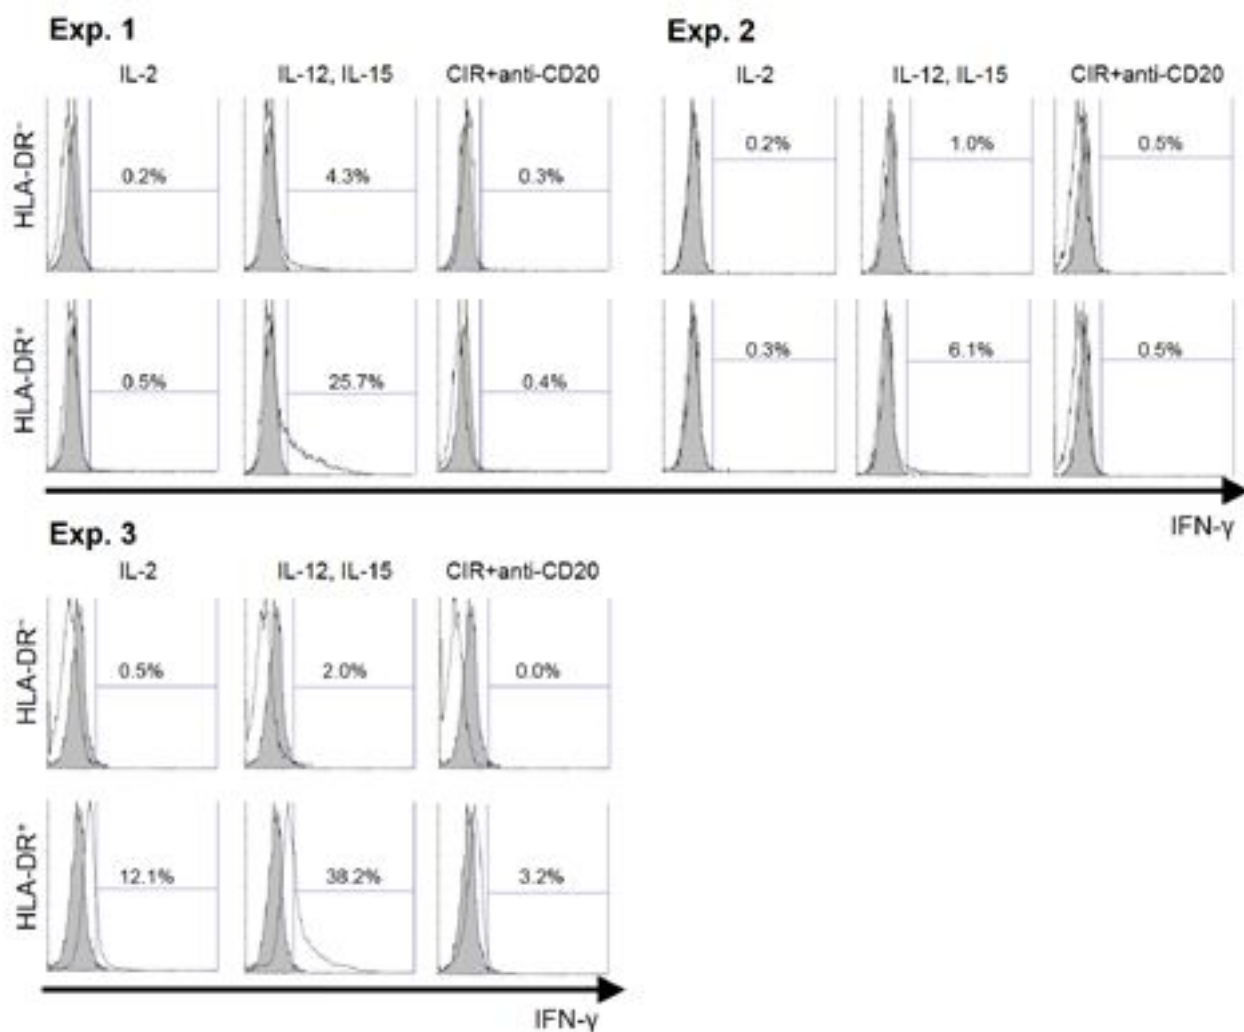

**Supplementary Figure 4.** Cytometry data of IFN $\gamma$  production by HLA-DR-positive and HLA-DR-negative NK cells, sorted after 6 days of stimulation with IL-2 and K562-mbIL-21, cultivated for 24 hours without stimuli and then restimulated. Overlay histograms show fluorescence intensity in isotype control (filled) and in the samples stained for IFN $\gamma$  (empty). Data obtained from three independent experiments are shown.
