# Supplementary material
Source: PubMed Central journal article supplement (PMC8063572)
Supplement: NIHMS1689119-supplement-Supp_table_S1.pdf [file NIHMS1689119-supplement-Supp_table_S1.pdf]

**Supplementary Table 1.** HLA-DR surface expression in peripheral blood NK cell subsets. Group 1 contains individuals who had proportion of HLA-DR-positive NK cells in CD56<sup>dim</sup>CD57<sup>+</sup> subset less than 5%, Group 2 – vice versa. Average values are given  $\pm$ SD. Significance of differences between group was estimated by Mann-Whitney *U* test. P-values of < 0.05 were considered significant. HLA-DR surface expression MFI (normalized) was calculated as  $(\text{exp}/\text{control} - 1) * 100$ , where exp – mean of fluorescence intensity of experimental sample, control – mean of autofluorescence.

| Donor #                                   | HLA-DR in total NK cells |                        | HLA-DR in CD56 <sup>bright</sup> |                        | HLA-DR in CD56 <sup>dim</sup> CD57 <sup>-</sup> |                        | HLA-DR in CD56 <sup>dim</sup> CD57 <sup>+</sup> |                         |
|-------------------------------------------|--------------------------|------------------------|----------------------------------|------------------------|-------------------------------------------------|------------------------|-------------------------------------------------|-------------------------|
|                                           | %                        | MFI, normalized        | %                                | MFI, normalized        | %                                               | MFI, normalized        | %                                               | MFI, normalized         |
| 1                                         | 5.3                      | 116.3                  | 51.1                             | 481.5                  | 2.7                                             | 22.3                   | 1.5                                             | 52.4                    |
| 2                                         | 3.7                      | 41.8                   | 35.0                             | 408.6                  | 4.1                                             | 33.8                   | 2.3                                             | 0.4                     |
| 3                                         | 2.4                      | 20.0                   | 46.9                             | 422.5                  | 2.3                                             | 7.5                    | 1.3                                             | -5.0                    |
| 4                                         | 5.9                      | 44.0                   | 47.5                             | 476.0                  | 3.7                                             | 36.0                   | 1.8                                             | 0.0                     |
| 5                                         | 7.8                      | 100.0                  | 31.9                             | 358.6                  | 8.5                                             | 158.6                  | 1.8                                             | 10.3                    |
| 6                                         | 2.6                      | 25.0                   | 26.3                             | 382.1                  | 3.8                                             | 21.4                   | 1.0                                             | 0.0                     |
| 7                                         | 3.9                      | 38.5                   | 21.9                             | 234.6                  | 2.5                                             | 53.8                   | 0.4                                             | 26.9                    |
| 8                                         | 4.6                      | 100.0                  | 27.5                             | 577.8                  | 6.0                                             | 137.0                  | 3.3                                             | 63.0                    |
| 9                                         | 2.5                      | 73.1                   | 17.1                             | 392.3                  | 1.7                                             | 57.7                   | 1.2                                             | 38.5                    |
| 10                                        | 2.1                      | 62.1                   | 20.4                             | 334.5                  | 2.9                                             | 75.9                   | 1.0                                             | 41.4                    |
| 11                                        | 0.8                      | 7.4                    | 10.1                             | 163.0                  | 0.9                                             | 14.8                   | 0.2                                             | -3.7                    |
| 12                                        | 5.6                      | 50.0                   | 32.6                             | 253.1                  | 8.9                                             | 146.9                  | 3.7                                             | 0.0                     |
| Average $\pm$ SD                          | 3.9 $\pm$ 2.0            | 56.5 $\pm$ 35.7        | 30.7 $\pm$ 12.8                  | 373.7 $\pm$ 115.9      | 4.0 $\pm$ 2.5                                   | 63.8 $\pm$ 54.2        | 1.6 $\pm$ 1.1                                   | 18.7 $\pm$ 24.5         |
| 1                                         | 6.2                      | 71.1                   | 22.3                             | 344.7                  | 3.3                                             | 42.1                   | 7.4                                             | 65.8                    |
| 2                                         | 12.4                     | 81.8                   | 39.3                             | 500.0                  | 5.5                                             | 42.4                   | 20.6                                            | 97.0                    |
| 3                                         | 4.7                      | 87.1                   | 24.7                             | 474.2                  | 2.1                                             | 93.5                   | 5.1                                             | 241.9                   |
| 4                                         | 11.5                     | 67.7                   | 34.2                             | 522.6                  | 6.5                                             | 80.6                   | 15.0                                            | 177.4                   |
| 5                                         | 14.0                     | 111.4                  | 66.0                             | 705.7                  | 12.9                                            | 105.7                  | 11.7                                            | 80.0                    |
| 6                                         | 7.6                      | 89.2                   | 45.9                             | 851.4                  | 4.9                                             | 70.3                   | 7.0                                             | 73.0                    |
| 7                                         | 22.1                     | 277.4                  | 55.3                             | 693.5                  | 22.3                                            | 316.1                  | 19.7                                            | 222.6                   |
| 8                                         | 6.9                      | 100.0                  | 40.9                             | 482.9                  | 12.1                                            | 234.3                  | 7.0                                             | 60.0                    |
| 9                                         | 6.6                      | 217.2                  | 26.5                             | 551.7                  | 13.9                                            | 379.3                  | 10.2                                            | 179.3                   |
| Average $\pm$ SD                          | 10.2 $\pm$ 5.5           | 122.5 $\pm$ 73.5       | 39.5 $\pm$ 14.6                  | 569.6 $\pm$ 153.2      | 9.3 $\pm$ 6.5                                   | 151.6 $\pm$ 125.9      | 11.5 $\pm$ 5.8                                  | 133.0 $\pm$ 72.1        |
| Significance of difference between groups | Significant, P = <0.001  | Significant, P = 0.043 | N/s                              | Significant, P = 0.006 | Significant, P = 0.014                          | Significant, P = 0.043 | Significant, P = <0.001                         | Significant, P = <0.001 |
