# Supplementary material
Source: PubMed Central journal article supplement (PMC8063572)
Supplement: NIHMS1689119-supplement-Supp_table_S2.pdf [file NIHMS1689119-supplement-Supp_table_S2.pdf]

**Supplementary Table 2.** HLA-DR expression in clones, obtained from freshly isolated unsorted NK cells and preliminary sorted HLA-DR-negative NK cell subset, on the 3<sup>rd</sup> week of their growth. HLA-DR surface expression MFI (normalized) was calculated as  $(\text{exp}/\text{control} - 1) * 100$ , where exp – mean of fluorescence intensity of experimental sample, control – mean of autofluorescence.

| Clones from unsorted NK cells |                          |                            | Clones from HLA-DR-negative subset |                          |                            |
|-------------------------------|--------------------------|----------------------------|------------------------------------|--------------------------|----------------------------|
| Clone #                       | HLA-DR-positive cells, % | HLA-DR-positive cells, MFI | Clone #                            | HLA-DR-positive cells, % | HLA-DR-positive cells, MFI |
| 1g6                           | 93.7                     | 960.0                      | 1g2                                | 100.0                    | 1868.8                     |
| 2f5                           | 96.6                     | 993.3                      | 1f7                                | 100.0                    | 2009.4                     |
| 2b4                           | 93.9                     | 833.3                      | 3g2                                | 100.0                    | 6868.8                     |
| 2g9                           | 94.7                     | 1200.0                     | 2g5                                | 100.0                    | 275.0                      |
| 1g5                           | 99.2                     | 2896.7                     | 5d4                                | 100.0                    | 7087.5                     |
| 1f8                           | 87.8                     | 673.3                      | 6e5                                | 47.0                     | 681.3                      |
| 2b7                           | 96.4                     | 1100.0                     | 3f6                                | 61.0                     | 587.5                      |
| 1f10                          | 90.5                     | 683.3                      | 4c5                                | 37.0                     | 618.8                      |
| 2d7                           | 99.6                     | 1636.7                     | 7d2                                | 85.0                     | 1150.0                     |
| 2e3                           | 76.4                     | 430.0                      | 8c4                                | 100.0                    | 962.5                      |
| 2d2                           | 99.8                     | 1840.0                     | 1-1                                | 100.0                    | 587.5                      |
| 2c9                           | 89.9                     | 3123.3                     | 1-2                                | 33.0                     | 1275.0                     |
| 1e8                           | 97.5                     | 1090.0                     | 1-3                                | 23.0                     | 275.0                      |
| 1f11                          | 64.8                     | 316.7                      | 1-4                                | 100.0                    | 4525.0                     |
| 2e11                          | 99.9                     | 2970.0                     | 1-5                                | 100.0                    | 743.8                      |
| 1e11                          | 100.0                    | 5886.7                     | 1-6                                | 43.0                     | 462.5                      |
| 2g6                           | 96.0                     | 1266.7                     | 1-7                                | 100.0                    | 2612.5                     |
| 1b8                           | 97.3                     | 1450.0                     | 1-8                                | 100.0                    | 306.3                      |
| 1e6                           | 99.6                     | 1443.3                     | 2-1                                | 20.0                     | 1587.5                     |
| 1g4                           | 36.0                     | 140.0                      | 2-2                                | 20.0                     | 1462.5                     |
| 2g4                           | 69.0                     | 346.7                      | 2-3                                | 24.0                     | 1556.3                     |
|                               |                          |                            | 2-4                                | 20.0                     | 1775.0                     |
|                               |                          |                            | 2-5                                | 12.0                     | 1587.5                     |
|                               |                          |                            | 2-6                                | 86.0                     | 1993.8                     |
